# Supplementary material for: A new immunochromatographic assay for on-site detection of porcine epidemic diarrhea virus based on monoclonal antibodies prepared by using cell surface fluorescence immunosorbent assay
Source: BMC Vet Res. 2019 Jan 18;15:32. doi: 10.1186/s12917-019-1773-4 (PMC6339306; doi:10.1186/s12917-019-1773-4)
Supplement: Supplementary file 5 — Figure S5. Optimization of the type of NC membrane. (DOC 413 kb) [file 12917_2019_1773_MOESM5_ESM.doc]

The optimization of the type of Nitrocellulose membrane (NC membrane)

To optimize the type of NC membrane, 5 kinds of NC membranes (PALL 140, PALL90, MILLIPORE 135, MILLIPORE 180, and SARTORIUS) were used to make the sandwich ICA. 80 ml PB (0.2 M，pH 7.4, containing 1% (w/v) Tween-20) was added to the test strip and photos were taken after reaction for 15 min.

**Results**


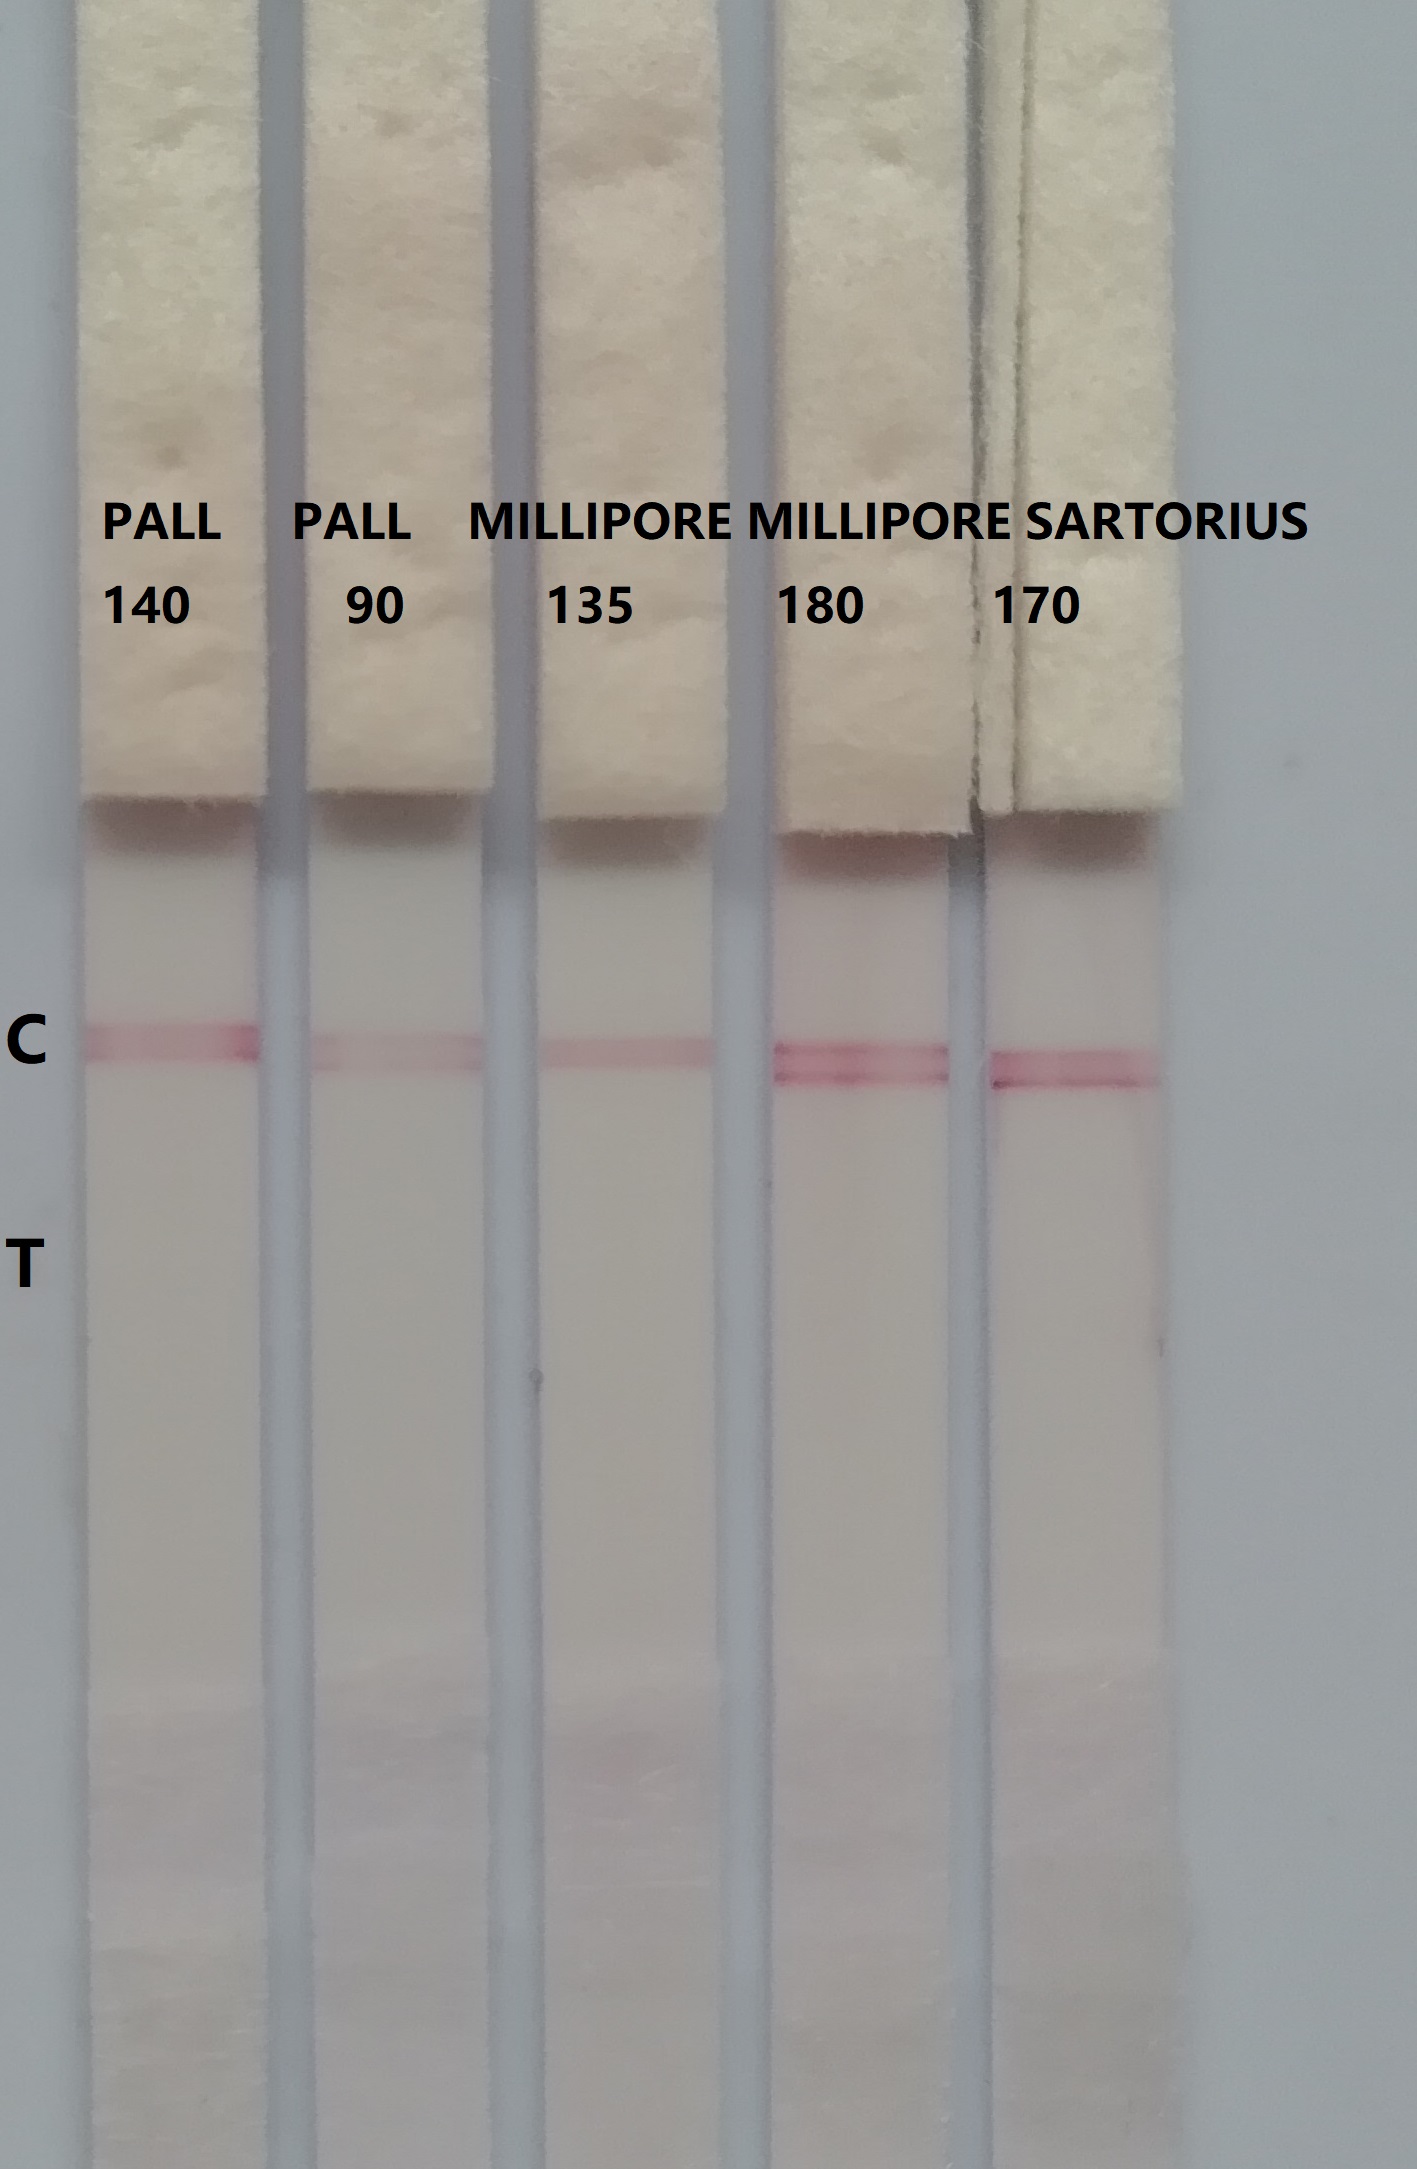


Fig. S5 Optimization of the type of NC membrane.
